# Supplementary material for: Model systems for flavoenzyme activity: a tuneable intramolecularly hydrogen bonded flavin–diamidopyridine complex
Source: Royal Society of Chemistry journal article supplement (doi:10.1039/b501887k), 2005-01-01
Supplement: b501887k.pdf [file b501887k.pdf]

## Electronic Supplementary Information (ESI)

### Model systems for flavoenzyme activity: a tuneable intramolecularly hydrogen bonded complex

Alan S. F. Boyd,<sup>a</sup> Joseph B. Carroll,<sup>b</sup> Graeme Cooke,<sup>\*a</sup> James F. Garety,<sup>a</sup> Brian J. Jordan,<sup>b</sup> Suhil Mabruk,<sup>a</sup> Georgina Rosair,<sup>a</sup> Vincent M. Rotello<sup>b</sup>

<sup>a</sup>Centre for Biomimetic Design & Synthesis, Chemistry, William H. Perkin Building, School of Engineering & Physical Sciences, Heriot-Watt University, Riccarton, Edinburgh, EH14 4AS, UK.

<sup>b</sup>Department of Chemistry, University of Massachusetts at Amherst, Amherst, MA 01002, USA.

#### Synthesis of *N*-(6-amino-pyridin-2-yl)-2,3-dimethyl-butyramide

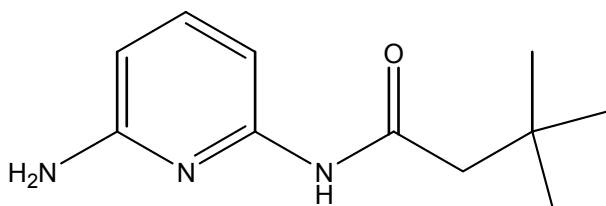

2,6-Diaminopyridine (15.41 g, 141.4 mmol) was dissolved in a mixture of CH<sub>2</sub>Cl<sub>2</sub> (600 mL) and NEt<sub>3</sub> (20 mL). After purging the solution with nitrogen, *tert*-butylacetyl chloride (20 mL, 141.4 mmol) was added dropwise over a period of thirty minutes. The solution was then allowed to stir at room temperature for 18 h under N<sub>2</sub>. The solvent was removed under reduced pressure and THF (200 mL) was added to the brown residue. Filtration of this suspension removed the triethylamine hydrochloride salt. The solution was then concentrated to give a brown solid, which was purified using column chromatography (silica gel, eluting with ethyl acetate) to afford **1** as a white solid (20.28 g, 71 %). Mp 96-98 °C;  $\nu_{\max}$  (KBr): 3470.9, 3442.21, 3367.6, 3248.5, 3059.6, 2952.1, 2906.4, 2865.3, 1950.9, 1654.4, 1610.1, 1542.0, 1462.4, 1365.2, 1355.5, 1327.5, 1300.6, 1287.1, 1235.7, 1201.9, 1162.8, 1138.9, 1076.0, 1042.2, 986.0, 947.2, 909.5; <sup>1</sup>H NMR (200 MHz, CDCl<sub>3</sub>)  $\delta$  = 7.75 (1H, s), 7.55 (1H, d), 7.50 (1H, t), 7.63 (1H, d), 4.40 (2H, s), 2.30 (2H, s), 1.15 (9H, s); <sup>13</sup>C NMR (100 MHz, CDCl<sub>3</sub>) 170.5, 157.5, 150.0, 140.0, 104.5, 103.5, 52.0, 51.5, 30.0; MS (EI)  $m/z$  = 207 (M<sup>+</sup>). Elemental analysis calcd. (%) for C<sub>11</sub>H<sub>17</sub>N<sub>3</sub>O: C 63.74, H 8.27, N 20.27; found: C 63.66, H 8.19, N 20.17.

#### Synthesis of 4-[6-(3,3-dimethyl-butyrylamino)-pyridin-2-ylcarbamoyl]-butyric acid

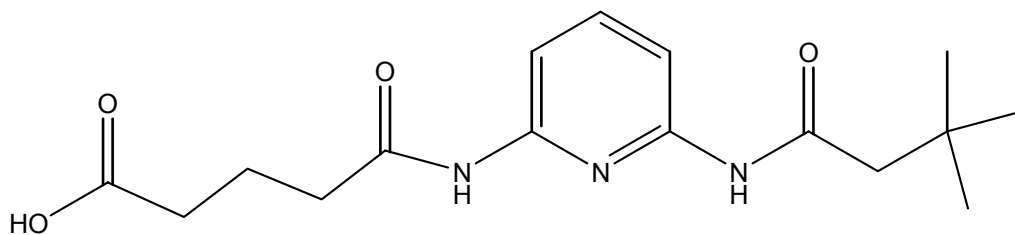

*N*-(6-Amino-pyridin-2-yl)-2,3-dimethyl-butyramide (1.06 g, 5.1 mmol) and glutaric anhydride (1.18 g, 10.4 mmol) were dissolved in pyridine (75 mL). The solution was then heated under reflux for 20 h. The solution was concentrated under reduced pressure to yield a dark brown oil. The subsequent addition of CH<sub>2</sub>Cl<sub>2</sub> (100 mL) resulted in the precipitation of a white solid, which was removed by filtration and washed

with CH<sub>2</sub>Cl<sub>2</sub> (50 mL) and dried under high-vacuum. The product was obtained as a white powder (1.14 g, 62%). Mp 167-169 °C;  $\nu_{\max}$  (KBr): 3284.5, 3203.0, 3058.1, 2967.5, 1704.9, 1668.7, 1614.3, 1587.2, 1541.9, 1455.8, 1369.8, 1329.1, 1288.3, 1215.8, 1161.5; <sup>1</sup>H NMR (200 MHz, CD<sub>3</sub>OD)  $\delta$  = 7.55 (3H, m), 2.45 (4H, m), 2.25 (2H, s), 1.95 (2H, m), 1.05 (9H, s); MS (EI)  $m/z$  = 321 (M<sup>+</sup>).

### Synthesis of **3**

4-[6-(3,3-Dimethyl-butylamino)-pyridin-2-ylcarbamoyl]-butyric acid (0.87 g, 2.7 mmol), *N*-(10)-hydroxyhexyl flavin\* (0.1845g, 0.54 mmol), EDCI (0.56 g, 2.70 mmol) and DMAP (1.01 g, mmol) were dissolved in dry DMF (25 mL), and the resulting solution was stirred under N<sub>2</sub> at room temperature for three days. The reaction mixture was then filtered, and the filtrate was concentrated under reduced pressure. The resulting residue was purified using column chromatography (silica gel, eluting with CH<sub>2</sub>Cl<sub>2</sub>/acetone, 9:1 v/v) to afford **3** as a yellow solid (0.15 g, 43%). Mp 198 °C<sub>dec</sub>;  $\nu_{\max}$  (KBr): 3421.0, 3276.3, 3208.9, 3054.5, 2954.2, 2867.6, 1698.6, 1670.3, 1583.7, 1546.7, 1448.2, 1401.8, 1352.1, 1276.1, 1242.5, 1199.5, 1176.0, 1155.8, 1135.0, 1012.7, 808.5. <sup>1</sup>H NMR (200 MHz, CDCl<sub>3</sub>)  $\delta$  = 12.50 (1H, s), 10.35 (1H, s), 9.75 (1H, s), 8.00 (1H, s), 7.95 (2H, d), 7.65 (1H, d), 7.40 (1H, d), 4.70 (2H, m), 2.75 (2H, t), 1.05 (9H, s); MS (ES)  $m/z$  = 646 [M+H]. Elemental analysis calcd. (%) for C<sub>34</sub>H<sub>43</sub>N<sub>7</sub>O<sub>6</sub>: C 63.24, H 6.71, N 15.18; found: C 63.64, H 6.92, N 15.17.

\* C. Frier, J.-L. Décout and M. Fontecave, *J. Org. Chem.*, 1997, **62**, 3520.

<sup>1</sup>H NMR spectra of **3** recorded at different concentrations in CDCl<sub>3</sub> at 25°C

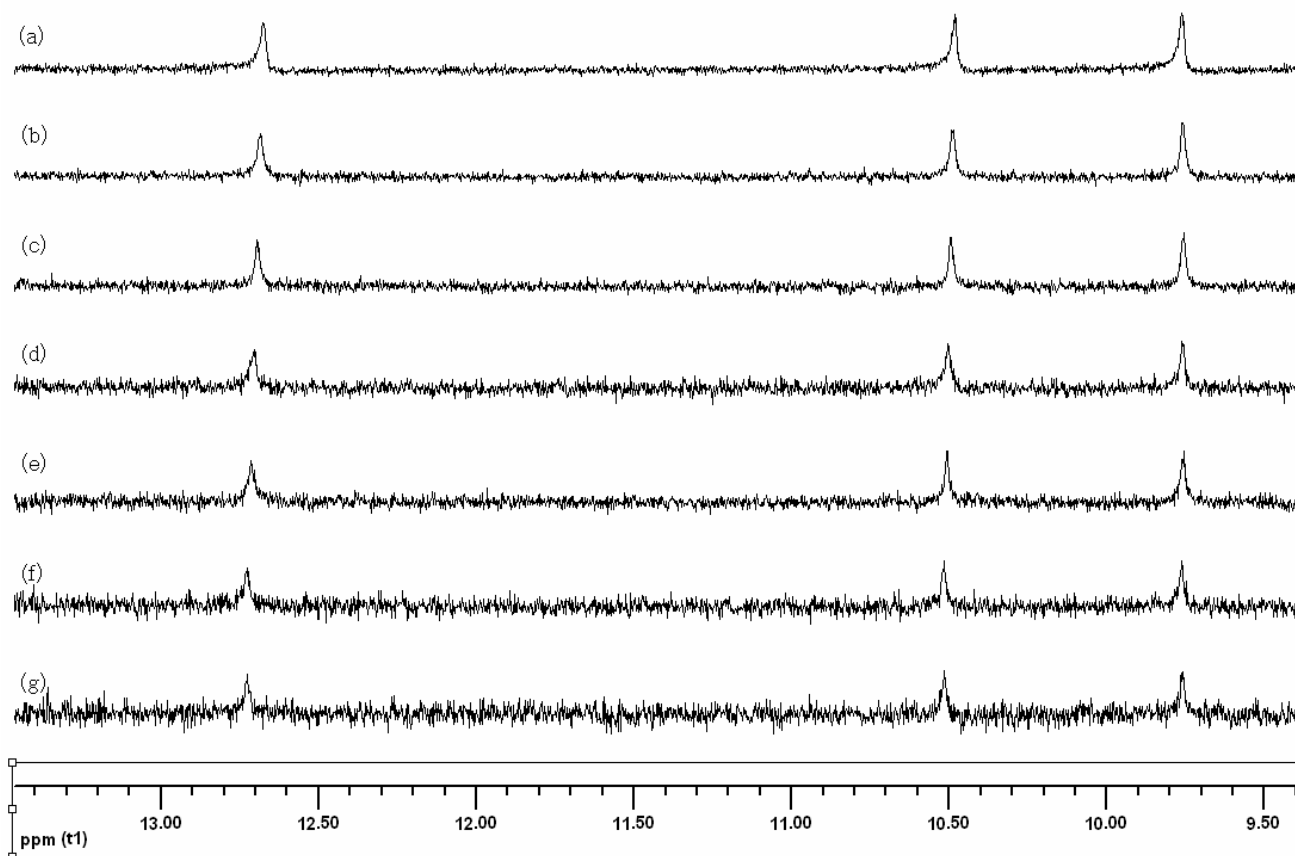

Selected 200 MHz <sup>1</sup>H NMR spectra of **3** recorded in CDCl<sub>3</sub> recorded at the following concentrations: (a) 1.2 × 10<sup>-2</sup> M; (b) 7.7 × 10<sup>-3</sup> M; (c) 5.8 × 10<sup>-3</sup> M; (d) 3.8 × 10<sup>-3</sup>; (e) 2.9 × 10<sup>-3</sup>; (f) 1.8 × 10<sup>-3</sup>; (g) 1.5 × 10<sup>-3</sup> M.

NMR titration data for 1.4 recorded in CDCl<sub>3</sub>

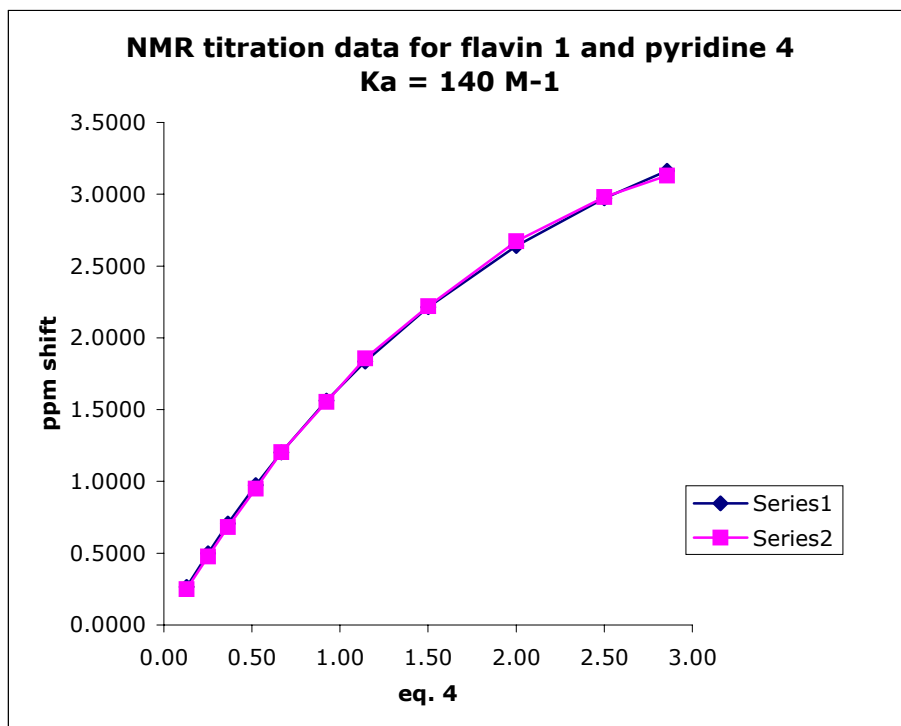

CV data for compound 1 upon the addition of excess 4.

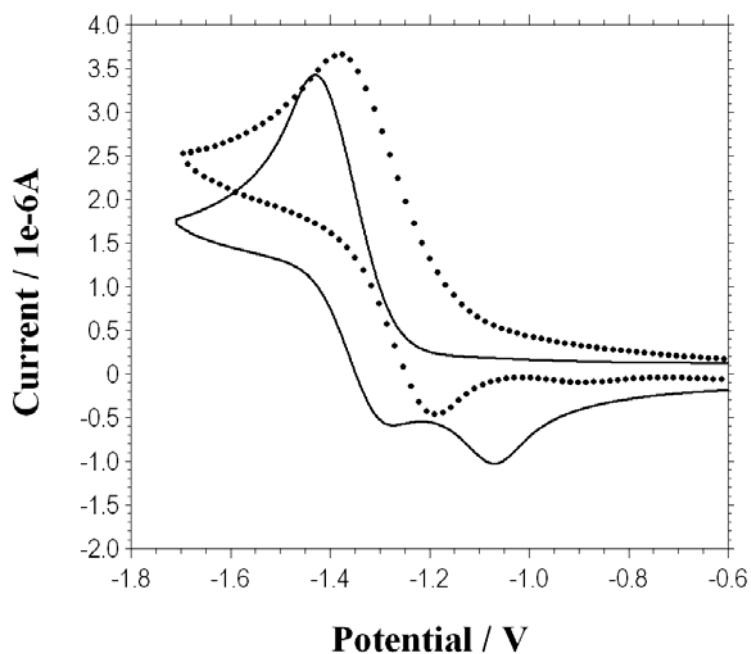

CV of **1** in CH<sub>2</sub>Cl<sub>2</sub> ( $\sim 4 \times 10^{-4}$  M) (—) and upon the addition of excess **4** ( $\sim 2 \times 10^{-2}$  M) (.....).

E<sub>1/2</sub> of **1** before addition of **4** = -1.36 V.

E<sub>1/2</sub> of **1** after the addition of **4** = -1.28 V.

Peak at -1.07 disappears.

Variable temperature  $^1\text{H}$  NMR spectra for compound **3** recorded in  $\text{C}_2\text{D}_2\text{Cl}_4$

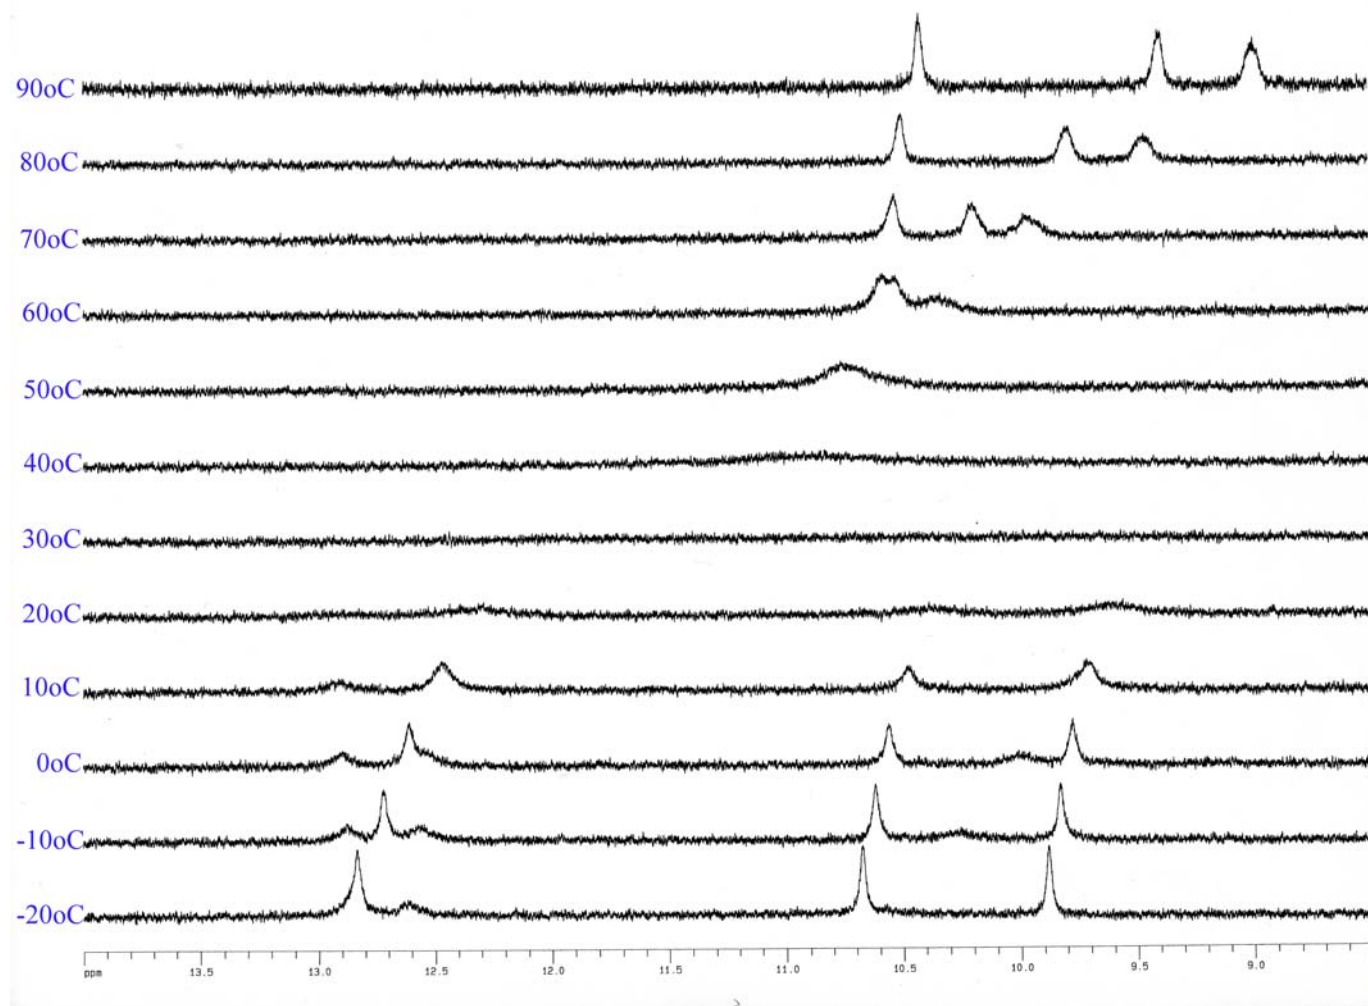

$^1\text{H}$  NMR spectra of **3** recorded in  $\text{CDCl}_3$  at  $25^\circ\text{C}$  in the presence of various equivalents of **5**

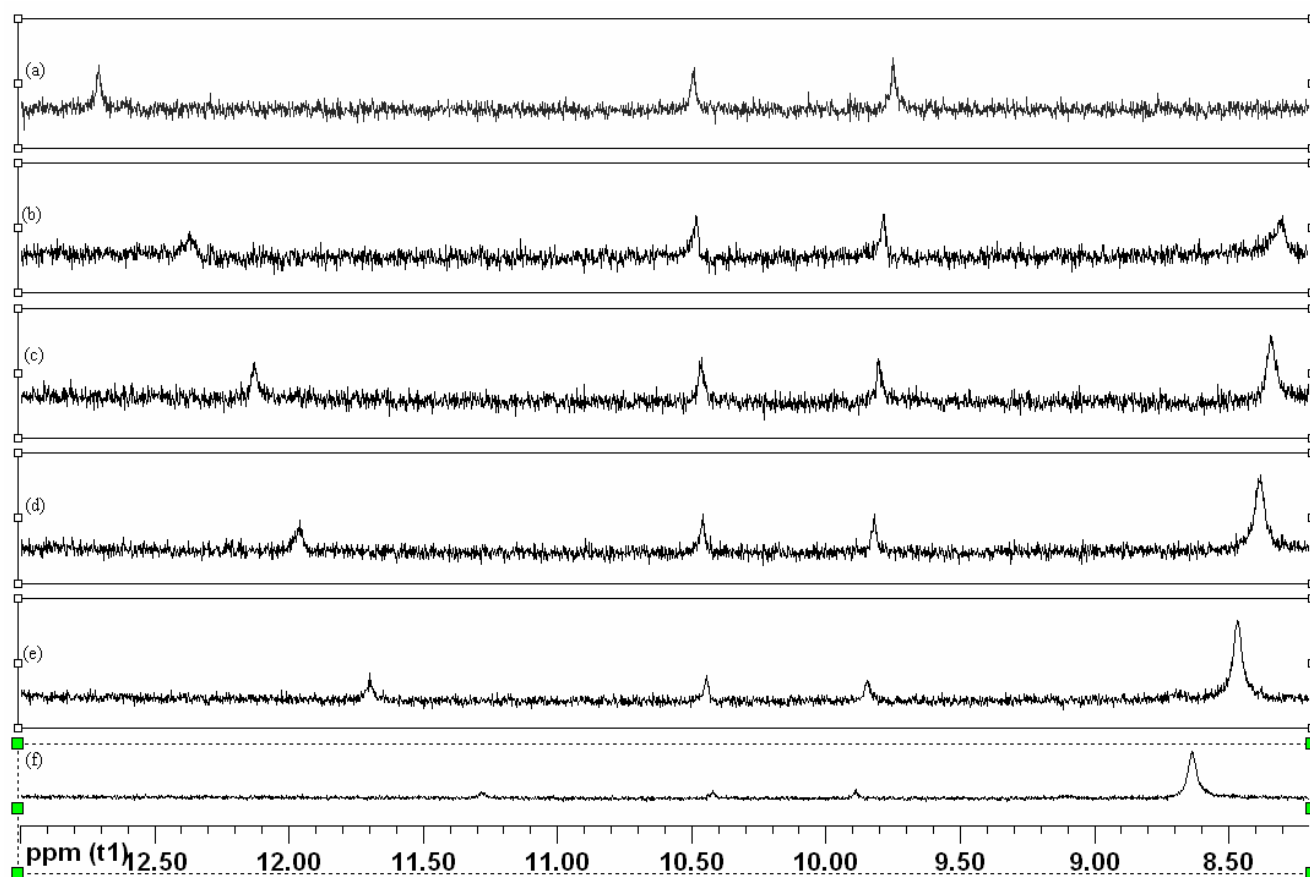

Selected 200 MHz  $^1\text{H}$  NMR spectra of **3** ( $7 \times 10^{-4}$  M in  $\text{CDCl}_3$ ) recorded in the presence of the following equivalents of **5**: (a) 0; (b) 1; (c) 3; (d) 7; (e) 12; (f) 24.
